# Supplementary material for: Expanded CD133+ Cells from Human Umbilical Cord Blood Improved Heart Function in Rats after Severe Myocardial Infarction
Source: Stem Cells Int. 2018 Apr 11;2018:5412478. doi: 10.1155/2018/5412478 (PMC5925035; doi:10.1155/2018/5412478)
Supplement: Supplementary 1 — Table S1: Volume of blood and number of cells collected/purified/expanded from eleven samples of human umbilical cord. [file 5412478.f1.xlsx]

## Sheet: Plan1
Table S1. Volume of blood and number of cells collected/purified/expanded from eleven samples of human umbilical cord
Sample	Blood volume from UC (ml)	Number of mononuclear cells (x106)	Number of purified CD133+ (x106)	Number of expanded CD133+ (x106)
1	50	41.5	0.4	1.8
2	80	40.5	0.35	1.4
3	100	15	0.5	1.36
4	50	25	0.72	1.96
5	30	14	0.54	1.47
6	100	80	0.6	4.1
7	100	20	0.27	1.84
8	80	7	0.3	2.05
9	150	95	0.2	N/D
10	150	181	1.0	N/D
11	130	246	2.4	N/D
Mean	92.72	69.54	0.66	1.99
S.D.	40.02	77.69	0.62	0.89
