# Supplementary material for: Expanded CD133+ Cells from Human Umbilical Cord Blood Improved Heart Function in Rats after Severe Myocardial Infarction
Source: Stem Cells Int. 2018 Apr 11;2018:5412478. doi: 10.1155/2018/5412478 (PMC5925035; doi:10.1155/2018/5412478)
Supplement: Supplementary 2 — Table S2: Heart rate statistics. [file 5412478.f2.xlsx]

## Sheet: Plan1
Table S2. Heart rate statistics
Variable	Group	N	Mean (bat/min)	Median	Minimum	Maximum	SD	p-value
								(C x P x E)
Pre-treatment	Control	10	301	273.5	202	486	102.3	0.322
	Purified	10	260.9	259.5	215	296	25.8
	Expanded	10	265.1	263	214	310	34.5
Post-treatment	Control	10	261.9	269	214	294	25.1	0.256
	Purified	10	235.9	245	175	294	40.4
	Expanded	10	246.7	249.5	201	332	36.2
Subtraction	Control	10	-39.1	-11	-236	92	111.3	0.834
(Pre - Post)	Purified	10	-25	-24	-115	55	48.1
	Expanded	10	-18.4	-22	-100	118	60.4
