# Supplementary material for: Expanded CD133+ Cells from Human Umbilical Cord Blood Improved Heart Function in Rats after Severe Myocardial Infarction
Source: Stem Cells Int. 2018 Apr 11;2018:5412478. doi: 10.1155/2018/5412478 (PMC5925035; doi:10.1155/2018/5412478)
Supplement: Supplementary 3 — Table S3: Statistics of the end-systolic volumes of the left ventricle. [file 5412478.f3.xlsx]

## Sheet: Plan1
Table S3. Statistics of the end-systolic volumes of the left ventricle
Variable	Group	N	Mean	Median	Minimum	Maximum	SD	p-value
								(C x P x E)
Pre-treatment	Control	10	0.53	0.54	0.3	0.69	0.14	0.352
	Purified	10	0.46	0.45	0.34	0.64	0.09
	Expanded	10	0.53	0.52	0.32	0.77	0.14
Post-treatment	Control	10	0.7	0.69	0.33	1.19	0.27	0.048*
	Purified	10	0.51	0.46	0.32	0.83	0.17
	Expanded	10	0.48	0.47	0.23	0.74	0.16
Subtraction	Control	10	0.17	0.18	-0.36	0.54	0.25	0.082
(Pre - Post)	Purified	10	0.05	0	-0.17	0.42	0.2
	Expanded	10	-0.04	-0.04	-0.29	0.22	0.15
* p-values comparing groups of 2: CxP = 0.047; CxE = 0.023; PxE =0.750
