# Supplementary material for: Expanded CD133+ Cells from Human Umbilical Cord Blood Improved Heart Function in Rats after Severe Myocardial Infarction
Source: Stem Cells Int. 2018 Apr 11;2018:5412478. doi: 10.1155/2018/5412478 (PMC5925035; doi:10.1155/2018/5412478)
Supplement: Supplementary 4 — Table S4: Statistics of the end-diastolic volume of the left ventricle. [file 5412478.f4.xlsx]

## Sheet: Plan1
Table S4. Statistics of the end-diastolic volume of the left ventricle
Variable	Group	N	Mean	Median	Minimum	Maximum	SD	p-value
								(C x P x E)
Pre-treatment	Control	10	0.73	0.75	0.47	0.88	0.14	0.4
	Purified	10	0.67	0.65	0.54	0.88	0.1
	Expanded	10	0.73	0.75	0.5	0.92	0.11
Post-treatment	Control	10	0.99	1.05	0.54	1.45	0.28	0.137
	Purified	10	0.83	0.79	0.62	1.17	0.17
	Expanded	10	0.8	0.79	0.54	1.18	0.2
Subtraction	Control	10	0.26	0.3	-0.34	0.59	0.28	0.173
(Pre - Post)	Purified	10	0.16	0.15	-0.06	0.63	0.21
	Expanded	10	0.07	0.09	-0.24	0.31	0.19
