# Supplementary material for: Expanded CD133+ Cells from Human Umbilical Cord Blood Improved Heart Function in Rats after Severe Myocardial Infarction
Source: Stem Cells Int. 2018 Apr 11;2018:5412478. doi: 10.1155/2018/5412478 (PMC5925035; doi:10.1155/2018/5412478)
Supplement: Supplementary 5 — Table S5: Statistics of the end-systolic area of the left ventricle. [file 5412478.f5.xlsx]

## Sheet: Plan1
Table S5. Statistics of the end-systolic area of the left ventricle
Variable	Group	N	Mean	Median	Minimum	Maximum	SD	p-value
								(C x P x E)
Pre-treatment	Control	10	1.01	1.04	0.74	1.22	0.17	0.395
	Purified	10	0.93	0.94	0.79	1.09	0.1
	Expanded	10	0.99	0.99	0.71	1.28	0.16
Post-treatment	Control	10	1.14	1.16	0.78	1.61	0.26	0.067
	Purified	10	0.95	0.9	0.73	1.27	0.18
	Expanded	10	0.93	0.92	0.59	1.21	0.2
Subtraction	Control	10	0.13	0.15	-0.44	0.47	0.26	0.158
(Pre - Post)	Purified	10	0.02	-0.04	-0.24	0.45	0.21
	Expanded	10	-0.06	-0.07	-0.4	0.21	0.17
