# Supplementary material for: Expanded CD133+ Cells from Human Umbilical Cord Blood Improved Heart Function in Rats after Severe Myocardial Infarction
Source: Stem Cells Int. 2018 Apr 11;2018:5412478. doi: 10.1155/2018/5412478 (PMC5925035; doi:10.1155/2018/5412478)
Supplement: Supplementary 6 — Table S6: Statistics of the end-diastolic area of the left ventricle. [file 5412478.f6.xlsx]

## Sheet: Plan1
	Table S6. Statistics of the end-diastolic area of the left ventricle
	Variable	Group	N	Mean	Median	Minimum	Maximum	SD	p-value
				(cm2)					(C x P x E)
	Pre-treatment	Control	10	1.21	1.27	0.93	1.36	0.14	0.454
		Purified	10	1.16	1.16	0.99	1.33	0.1
		Expanded	10	1.22	1.26	0.96	1.41	0.12
	Post-treatment	Control	10	1.43	1.48	1.08	1.78	0.23	0.132
		Purified	10	1.3	1.28	1.13	1.56	0.15
		Expanded	10	1.26	1.29	1.0	1.55	0.19
	Subtraction	Control	10	0.21	0.2	-0.27	0.5	0.24	0.159
	(Pre - Post)	Purified	10	0.14	0.13	-0.06	0.57	0.18
		Expanded	10	0.04	0.04	-0.26	0.3	0.18
