# Supplementary material for: Expanded CD133+ Cells from Human Umbilical Cord Blood Improved Heart Function in Rats after Severe Myocardial Infarction
Source: Stem Cells Int. 2018 Apr 11;2018:5412478. doi: 10.1155/2018/5412478 (PMC5925035; doi:10.1155/2018/5412478)
Supplement: Supplementary 7 — Table S7: Statistics of the ejection fraction of the left ventricle. [file 5412478.f7.xlsx]

## Sheet: Plan1
Table S7. Statistics of the ejection fraction of the left ventricle
Variable	Group	N	Mean	Median	Minimum	Maximum	SD	p-value
								(C x P x E)
Pre-treatment	Control	10	27.4	0.26	18.2	36.8	6.8	0.538
	Purified	10	31.1	32.5	15.3	38.3	6.7
	Expanded	10	28.6	31.2	10.0	37.2	9.0
Post-treatment	Control	10	29.9	34.0	14.8	40.0	9.8	0.1
	Purified	10	38.3	39.7	15.0	51.3	11.7
	Expanded	10	40.0	37.1	25.8	60.0	10.8
Subtraction	Control	10	2.5	-0.6	-7.0	17.7	9.6	0.159
(Pre - Post)	Purified	10	7.1	10.1	-12.1	19.3	10.5
	Expanded	10	11.5	10.6	-0.5	25.8	10.1
